# **Metamorphosis imposes variable constraints on genome expansion**

**Article type:** Major Article

**Keywords:** genome size, constraint, development, comparative methods, life history

**Word Count:** 7,729

**Figures:** 2

**Tables:** 4

# **Abstract**

Genome size varies ~ 100,000-fold across eukaryotes. Genome size is heavily shaped by transposable element accumulation, the dynamics of which are increasingly well understood. However, given that traits like cell size and rate of development co-vary strongly with genome size, organism-level trait evolution likely shapes genome size diversity as well. Metamorphosis — a radical transformation of morphology — has been hypothesized to impact genome size because it can be a vulnerable part of the life cycle. Thus, selection may act to limit metamorphic duration, indirectly constraining the rate of development as well as genome and cell sizes. Salamanders have large and variable genomes — 3 to 40 times that of humans — and species exhibit a range of metamorphic and non-metamorphic life histories. Using salamanders, we test the hypothesis that different types of metamorphic repatterning during the life cycle impose different constraints on genome expansion. We show that metamorphosis during which animals are unable to feed imposes the most severe constraint against genome expansion. Other types of metamorphosis that differ in energetic provisioning impose less severe constraints. More generally, our work demonstrates the utility of phylogenetic comparative methods in testing the role of constraint in shaping phenotypic evolution.

# Introduction

Across the tree of life, few characters exhibit the tremendous scale of variation of genome size, encompassing a ~100,000-fold range across eukaryotes (Gregory 2021). Decades of research have revealed the consistent covariation of two organismal features with genome size: a negative correlation with cell division rate, and a positive correlation with cell size (Gregory 2001, 2005). Genome size has also been associated with a variety of organismal or ecological factors including: developmental rate or complexity (Gregory 2002b), temperature (Hessen, et al. 2013), metabolic rate (Waltari and Edwards 2002; Roddy, et al. 2019), invasiveness (Pandit, et al. 2014), or speciation and extinction rates (Vinogradov 2004; Jeffery, et al. 2016), but these associations vary across studies.

Comparative biologists often think of adaptive explanations for character associations, which would suggest that genomes evolve toward an "optimum" size with respect to one or more of these correlated traits. However, the context-sensitive nature of associations with these factors belies a strongly adaptive explanation for genome size. For example, metabolic rate and genome size are correlated in some vertebrate clades, but not in others, and genome size provides no overall explanatory power for basal metabolic rate across vertebrates (Licht and Lowcock 1991; Gregory 2002a; Smith, et al. 2013; Uyeda, et al. 2017; Gardner, et al. 2020). Genome size evolution may instead evolve nearly neutrally until some threshold value is reached, beyond which fitness is

impacted (Gregory 2002b). This process is more aptly described as governed by constraints. As far as we are aware, the constraint model has never been formally tested within a phylogenetic comparative framework for a univariate trait.

Recent years have seen tremendous improvement in our understanding of the mechanistic processes by which genome size evolves. Variation in genome size can reflect the accumulation of many types of sequences, from simple repeats to increases in ploidy (Elliott and Gregory 2015; Pasquesi, et al. 2018; Carta, et al. 2020), such that the majority of the genome is non-coding or “junk” DNA. In vertebrate animals, genome size is strongly determined by the accumulation of transposable elements (TEs), sequences that replicate and spread throughout host genomes (Sotero-Caio, et al. 2017; Shao, et al. 2019). TEs are also deleted by mutations introduced during replication, recombination, and DNA repair (Michael 2014; Vu, et al. 2017). In the absence of selection or constraint on genome size, the background process for genome evolution is stochastic, with genome size increasing if TE insertions outpace deletions. TE activity is often neutral at the cellular and organismal levels, with most individual insertions and deletions missing functional regions of the genome and resulting in negligible fitness consequences (Arkhipova 2018). Non-coding DNA can therefore accumulate until genome size crosses a threshold where it begins to impact fitness through a correlated trait (e.g. cell size or developmental rate).

While the notion of constraint on genome size is conceptually appealing, there are few comparative methods that can detect constraint and possibly distinguish it from adaptation. Whether by correlation of phylogenetically independent contrasts

(Felsenstein 1985) or by phylogenetic autocorrelation (Cheverud, et al. 1985), phylogenetic comparative methods that focus primarily on the mean or "location" of the phenotype are primed to detect adaptive evolution, as selection is expected to move the phenotype toward an optimum (Simpson 1953; Lande 1980). For example, testing for a correlation between traits after independent contrasts (Felsenstein 1985) may reveal whether, on average, a phenotype covaries across species with some other trait, with the relationship maintained presumably as a result of adaptive evolution. Phylogenetic autocorrelation (Cheverud, et al. 1985) and phylogenetic regression (Grafen and Hamilton 1989) use regression approaches to separate phylogenetic and environmental (adaptive) effects on variation of the mean phenotype. Ancestral character state reconstruction methods can infer the mean phenotype of interest along nodes of the tree and are used to explore evolution in relation to some other factor, but vary in the underlying models employed (Huey and Bennett 1987; Maddison 1991; Schluter, et al. 1997). How mean-focused methods enable the detection of constraint, however, is unclear. Methods that model both the mean and variance of a stochastically evolving phenotype, such as Ornstein-Uhlenbeck-based methods (Hansen 1997; Butler and King 2004; O'Meara, et al. 2006; Beaulieu, et al. 2012), may open the door to exploring constraint by revealing whether a stochastically spreading phenotype evolves by selection, or by weak selection bounding the phenotype consistent with the presence of constraint, or by no selection at all.

Salamanders are an ideal group to test hypotheses of selection and constraint on genome size. They have both the largest genomes and the largest range of variation in genome size among vertebrates. Genome sizes range from 9 Gb – 120 Gb across the

763 extant species (Decena-Segarra, et al. 2020; AmphibiaWeb 2021; Gregory 2021), reflecting varying levels of TE accumulation. Salamanders also have exceptional life-history diversity, in particular, with metamorphosis lost, modified, and regained throughout their evolutionary history (Wiens, et al. 2005; Bonett, et al. 2014). Metamorphosis has been hypothesized to shape genome size evolution because of the effects that genome (and therefore cell) size has on the rate of development (Wake and Marks 1993; Gregory 2002b). Because metamorphosis can be a vulnerable part of the life cycle, its duration has been proposed as a target of natural selection. Selection to limit the time in metamorphosis would indirectly select for faster development, constraining genomes (and cells) to smaller sizes (Gregory 2002b; Bonett, et al. 2020).

Several studies have linked life history to genome size in salamanders, with smaller (albeit still enormous relative to other taxa) genome sizes associated with metamorphosis (Wake and Marks 1993; Gregory 2002b; Sessions 2008; Bonett, et al. 2020). Bonnett (2020) used phylogenetic comparative methods to demonstrate that salamander genome size is better explained by models that account for differences in life history — including the presence or absence of metamorphosis — as opposed to variation in ecology or habitat stability. However, this study was largely focused on the effects of facultative loss of metamorphosis on genome size evolution; thus, it did not explore the concept of evolutionary constraint versus adaptation. In addition, it did not examine the connection between energetic vulnerability and metamorphic duration, which we propose as a key conceptual link between metamorphosis and genome size.

In this study, we build on this previous body of work, revisiting the hypothesis that the radical morphological repatterning associated with metamorphosis imposes evolutionary constraints on genome size in salamanders. In particular, we model characteristics that are likely to place energetic limits on the duration of metamorphosis: Does repatterning happen inside the egg, fueled solely by yolk stores? Does repatterning happen in an organism that is free-living, but unable to feed? We use life history and genome size data to inform stochastic models of trait evolution that explore how different metamorphic regimes interact with genome expansion. More generally, we demonstrate the ability of OU-based stochastic models to identify trait evolution governed by constraint, expanding their use beyond classic scenarios of adaptive evolution.

### *Life History Regimes Constraining Genome Size Evolution*

In the absence of any selection or constraint, genome size in salamanders is expected to expand by biased stochastic evolution. Overall mutation pressure in the clade leads to TE accumulation, as TE deletion rates are low and TE silencing is incomplete (Sun, Arriaza, et al. 2012; Frahy, et al. 2015; Madison-Villar, et al. 2016; Muhlhenrich and Mueller 2016). Salamanders' enormous genomes are the cumulative result of unusually high levels of TE activity and retention (Sun, Shepard, et al. 2012; Sun and Mueller 2014; Keinath, et al. 2015; Liedtke, et al. 2018; Nowoshilow, et al. 2018).

The ancestral salamander life history included a larval growth stage followed by metamorphosis. Metamorphosis is a radical transformation of morphology during the life cycle that produces strikingly different, largely decoupled larval and adult forms

(Moran 1994). During metamorphosis, as during embryogenesis, salamanders undergo rapid cell division, differentiation, migration, and apoptosis (Alberch 1989). The dynamics of these cellular processes are affected by genome size and cell size; as genome/cell sizes increase, developmental rates throughout ontogeny — from embryogenesis through metamorphosis — slow down (Horner and Macgregor 1983; Jockusch 1997). Metamorphosis has been lost and regained from the life cycle numerous times by different mechanisms (Chippindale, et al. 2004; Mueller, et al. 2004; Wiens, et al. 2005; Bonett, et al. 2014), producing multiple life history regimes that could shape genome size evolution. We outline these regimes, and their predicted effects on genome size evolution, below and in Figure 1:

*Paedomorphosis:* In paedomorphic species, some or all stages of metamorphic repatterning are lost, and organisms reach sexual maturity retaining largely larval traits (Gould 1977). Because there is no selection to limit time in metamorphosis, there is no associated constraint on genome size. Thus, paedomorphs are expected to most closely reflect the background condition of stochastic genome expansion.

*Direct development:* In direct-developing species, the larval growth stage is eliminated, and embryogenesis and metamorphosis are integrated into a single sequence of developmental events that takes place inside the egg (Alberch 1989; Rose 2014). This entire sequence must be fueled by yolk provisioned by the mother. Thus, we might expect selection to limit time in metamorphosis, imposing a constraint on genome size.

*Non-feeding metamorphosis:* Within the salamander family Plethodontidae, metamorphic repatterning events happen relatively synchronously in a free-living organism. During this metamorphosis, the organisms are unable to feed because of the replacement



of cartilaginous elements associated with the change from suction to projectile feeding (Rose 1995a; Deban and Marks 2002). The entire process must be fueled by energy reserves built up during the larval stage. Thus, we might expect selection to limit time in metamorphosis, imposing a constraint on genome size.

*Feeding metamorphosis:* In non-plethodontid salamanders, metamorphic repatterning events happen in a free-living organism that is able to feed throughout the transformation. Thus, we would not expect selection based on energy demands to limit time spent in metamorphosis. There are, however, other ways in which metamorphosis can increase vulnerability that might translate into selection on metamorphic duration, constraining genome size.

172

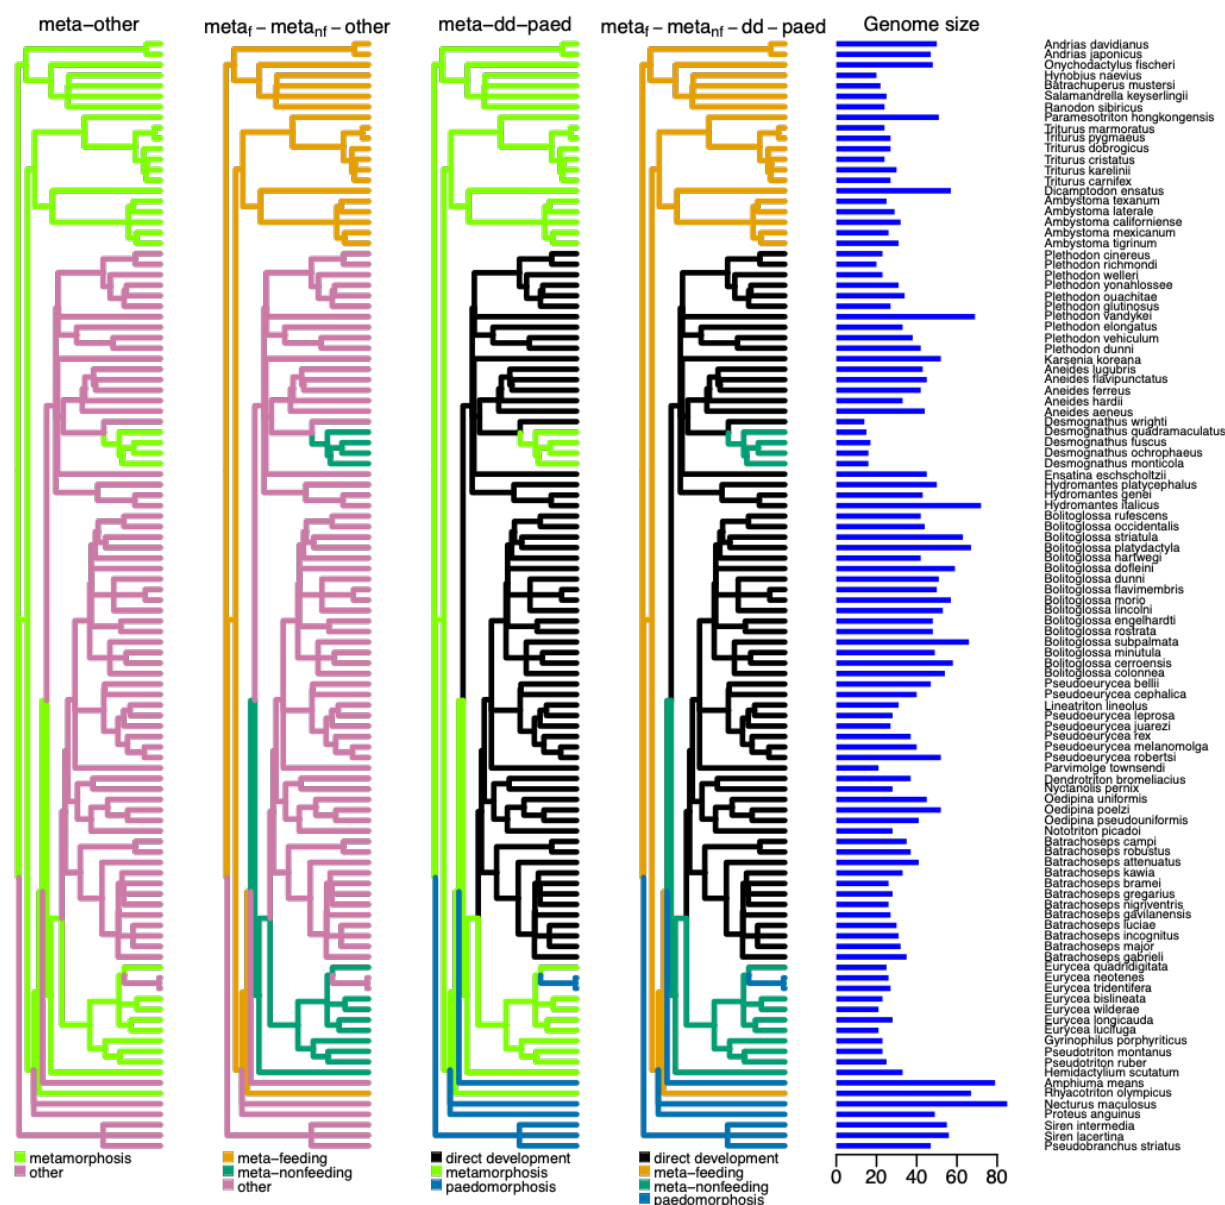

173

174

175

176

177

178

179

Figure 1. Alternative hypotheses for constraints imposed by development on genome size evolution in salamanders. On each phylogeny, alternative life history regimes are painted in different colors as indicated in each legend (see text). Genome sizes are shown on the right in pg (1 pg = 978 Mb).

# Methods

## *Taxon Sampling, Genome Size, and Phylogeny*

Genome size data were available for 106 species of salamanders (out of a total of 763 currently named extant species), encompassing all ten salamander families and 35 of 68 genera (Supplemental Table 1) (AmphibiaWeb 2021; Gregory 2021). We transformed the data with natural logarithms prior to analysis. Our sampling includes representatives with diverse life histories: direct development, paedomorphosis, feeding metamorphosis, and non-feeding metamorphosis. Hereafter, we distinguish between "feeding" and "non-feeding metamorphosis", and use "metamorphosis" to indicate all species which undergo metamorphosis, whether feeding or non-feeding. Several lineages are facultative paedomorphs, which retain the ability to undergo metamorphosis under certain conditions. We coded these taxa as metamorphic, reflecting the experience of constraint, even if only occasionally, and supported by recent work examining the evolutionary impacts of facultative paedomorphosis (Bonett, et al. 2020).

We used a previously published phylogeny (Mueller, et al. 2008; Pyron and Wiens 2011; Vieites, et al. 2011; Zheng, et al. 2011) and estimated branch lengths on this topology using sequence data for two mitochondrial genes – cytochrome-b and 16S obtained from GenBank. Additional Sanger sequences were collected as necessary at the Colorado State University sequencing core facility or the Joint Genome Institute following (Mueller, et al. 2004) (Supplemental Table 1). Loci were aligned using MUSCLE

(Edgar 2004). Branch lengths were estimated for each locus independently and then averaged, weighted by gene length. Branch lengths were estimated using RAxML (Stamatakis 2006) using the best-fit (AIC) model of nucleotide substitution in ModelTest 3.6 (Posada and Crandall 1998), with Cyt-b partitioned by codon. The resulting tree was ultrametricized using penalized likelihood implemented in r8s with the truncated Newton algorithm and cross validation to select the optimal smoothing parameter value (Sanderson 2003).

# *Models of Genome Size Evolution*

We modeled genome size evolution using both Brownian motion (BM) and Ornstein-Uhlenbeck (OU) models of evolution (Hansen 1997; Butler and King 2004; O'Meara, et al. 2006; Beaulieu, et al. 2012). As these models have been described previously, we cover them only briefly here. The BM model is the simplest stochastic model used in comparative analysis and has a single rate parameter  $\sigma$ , which can be thought of as a stochastic noise intensity parameter shared by all taxa and describing the magnitude of the independent random walks of the trait evolving along the branches of the phylogeny. This model predicts that across lineages, there will be no change in mean phenotype, but variance will grow through time as lineages wander over trait space, and the expected variance between two lineages will be proportional to the time since their divergence. Conceptually, the BM model may be a good candidate for purely stochastic genome size evolution if increases occur as frequently as decreases.

The multiple-rate BM model, introduced by O'Meara, et al. (2006), allows different  $\sigma$  values across different portions of a phylogenetic tree. We use this model to represent changes in the rate of stochastic evolution accompanying changes in constraint resulting from shifts in life history regime. Under this model, lineages evolving under different regimes may differ in variance.

OU models generalize the BM model by including terms that allow the mean to shift as well as allowing variance to narrow. They include a deterministic component of trait evolution that models the tendency of the trait to move toward an equilibrium value. Mathematically, the model for trait evolution expressed as a differential equation is

$$dX(t) = \alpha(\theta(t) - X(t)) + \sigma dB(t),$$

where  $\theta(t)$  is the deterministic equilibrium for the trait at time  $t$  and  $\alpha$  is an evolutionary rate describing the *strength of the deterministic pull (e.g. selection)* towards that equilibrium along a branch of a tree. Hypotheses regarding trait evolution are specified by painting “regimes” on the tree to indicate where these parameters are expected to shift. The simplest OU models allow multiple equilibria leading to the evolution of differences in mean phenotype across regimes (Hansen 1997; Butler and King 2004); for example, in the current study, separate equilibria might exist for paedomorphs, metamorphosers, and direct developers. Further model extensions also allow the strength of the deterministic pull and the stochastic noise intensity to vary across regimes (Beaulieu, et al.

2012), as might be consistent with the lifting or imposition of constraints on genome size evolution.

We formalized five hypotheses for how life history regime could constrain genome size evolution in salamanders: (1) Brownian motion: Genome size evolves by purely stochastic evolutionary processes with neither constraint nor bias. (2) *metamorphosis-other*: Metamorphosis imposes a constraint on genome expansion that is distinct from the other life histories. (3) *meta-paed-dd*: Metamorphosis, direct development, and paedomorphosis each impose distinct constraints on genome expansion. (4) *meta<sub>f</sub>-meta<sub>nf</sub>-other*: Feeding metamorphosis (*meta<sub>f</sub>*) and non-feeding metamorphosis (*meta<sub>nf</sub>*) each impose constraints that are distinct from those experienced by salamander species with other life histories. (5) *meta<sub>f</sub>-meta<sub>nf</sub>-paed-dd*: non-feeding metamorphic species, feeding metamorphic species, paedomorphic species, and direct-developing species each experience different levels of constraint on genome expansion.

These five biologically-inspired hypotheses are specified by fitting evolutionary models that allow their parameters to vary with life history regime. The simplest form allows the equilibrium to vary with life history regime while assuming the rates of evolution are constant across the phylogeny. Additional subhypotheses fit evolutionary models that vary stochastic noise intensity values ( $\sigma$ ), and/or deterministic pull values ( $\alpha$ ) according to life history regime (Table 1). In all, we tested 21 models to explore life history constraints on genome size and model parameters (Table 2). We fit all of the models with the character state of the node at the base of the plethodontid lineage defined as metamorphosing as well as direct-developing (Bonett, et al. 2014), and found that the choice of the basal character state made no qualitative difference to our conclusions. In

addition, we made a series of pairwise comparisons to further assess the degree of influence of feeding metamorphosis, paedomorphosis, direct development, and non-feeding metamorphosis on genome size evolution in combinations of increasing complexity (Table 3).

We fit models of evolution using the software package OUwie (Beaulieu, et al. 2012) and compared the multiple optimum OU models with results fitted in OUCH (Butler and King 2004; King and Butler 2009). We modified OUwie to fit models with regime changes that occur at the nodes, as in OUCH, rather than the default behavior of OUwie which places regime changes mid-way along the branch between a clade of interest and its ancestor. We recognize that while either choice can be argued to be arbitrary, assuming that the regime change occurred simultaneously with the origin of the clade that bears the phenotype as indicated in Figure 1 seems reasonable. All analyses were conducted in the R statistical computing environment (R Core Team 2020). We note here that OUwie has different options for dealing with the root state,  $X(0)$ . Absent any information about the phenotype deep in the tree, this parameter is often very difficult to estimate in OU models (Cressler, et al. 2015). One alternative is to assume that the value of  $X(0)$  is distributed according to the stationary distribution of an OU process, which eliminates this parameter by absorbing the variance into the covariance matrix implied by the phylogeny itself (Ho and Ané 2013). However, OUwie does not currently support this approach for OU models with multiple  $\alpha$  or  $\sigma$  parameters, and as far as we know, the mathematical modifications for these models have not been worked out. Because the option to estimate the value of the root node as in the earlier implementations

(Hansen 1997; Butler and King 2004); and specified in OUwie by setting root.station=FALSE) is available for all of the models of interest, we used it for all model fitting. However, as we show in the Supplementary Materials, the parameter estimates of a single- $\alpha$ , single- $\sigma$  OU model fit assuming the root is in the stationary distribution are very different from the parameter estimates obtained by fitting the root state, although model selection conclusions hold. This large difference in the parameter values reinforces a general point in phylogenetic comparative hypothesis testing, which is that parameter estimation is often more fraught than hypothesis testing, and as such, parameter estimates should be interpreted with caution (Beaulieu, et al. 2012; Ho and Ané 2013; Ho and Ané 2014; Cressler, et al. 2015; Cooper, et al. 2016).

When fitting OU models, there are datasets for which it is possible to recover an extremely low value of  $\alpha$  (weak deterministic pull), with equally extremely large  $\theta$  (equilibrium values). This combination can reasonably be interpreted as weak selection, or a biased nearly-random walk. Rather than look only at these parameters in isolation, we considered whether it may be more informative to determine their combined effect on trait evolution. To this end, we calculated the value of  $\alpha(X - \theta)$  for each life history regime to estimate any "deterministic trend" imposed by the best-fitting model, where  $X$  is the average genome size of species in that regime at the end of the evolutionary process.



Table 1. BM and OU models with single or multiple parameters used to fit the data. Numbers in parentheses specify (1) model parameters and notation, (2) parameters that remain constant across the phylogeny, (3) parameters that vary with shifts in life history regime, (4) O'Meara (2006) model notation, and (5) notes for the model implementations and citations.

| Models                                                                            | Uniform              | Variable<br>with Re-<br>gime | O'Meara<br>Notation | Notes                                               |
|-----------------------------------------------------------------------------------|----------------------|------------------------------|---------------------|-----------------------------------------------------|
| (1)                                                                               | (2)                  | (3)                          | (4)                 | (5)                                                 |
| Single noise intensity $\sigma$                                                   | $\sigma$             |                              | BM1                 | Classic BM model of (Felsenstein 1985)              |
| Multiple noise intensities $\sigma_i$                                             |                      | $\sigma_i$                   | BMS                 | Multiple-rate BM model of O'Meara et al. (2006)     |
| Multiple equilibria $\theta_i, \sigma, \alpha$                                    | $\sigma$<br>$\alpha$ | $\theta_i$                   | OUM                 | OU model of Butler and King (2004)                  |
| Multiple equilibria and deterministic pull strengths $\theta_i, \sigma, \alpha_i$ | $\sigma$             | $\alpha_i$<br>$\theta_i$     | OUMA                | Multiple- $\alpha$ model of Beaulieu et al. (2012). |
| Multiple equilibria and noise intensities $\theta_i, \sigma_i, \alpha$            | $\alpha$             | $\sigma_i$<br>$\theta_i$     | OUMV                | Multiple- $\sigma$ model of Beaulieu et al. (2012)  |

|                                                                                                         |  |                                        |       |                                       |
|---------------------------------------------------------------------------------------------------------|--|----------------------------------------|-------|---------------------------------------|
| Multiple equilibria, noise intensities, and deterministic pull strengths $\theta_i, \sigma_i, \alpha_i$ |  | $\sigma_i$<br>$\alpha_i$<br>$\theta_i$ | OUMVA | Full model of Beaulieu et al. (2012). |
|---------------------------------------------------------------------------------------------------------|--|----------------------------------------|-------|---------------------------------------|

317  
318

# *Model Comparison and Parameter Estimation*

We compared the fit of each of the models using the Akaike Information Criterion corrected for small sample size (AIC<sub>c</sub>). We further performed model selection bootstrap analysis (phylogenetic Monte Carlo; (Boettiger, et al. 2012) for targeted comparisons of the models in Table 3 to assess the strength of evidence for different hypotheses as well as the power to detect differences in model support. Model selection bootstrap analysis is necessary because AIC<sub>c</sub> differences can favor more complicated models, even when a simpler model is correct (Boettiger, et al. 2012). For each comparison, we computed the observed likelihood difference,

$$\delta_{\text{obs}} = -2 (\log L_0 - \log L_1),$$

where  $L_0$  is the likelihood of the simpler model and  $L_1$  is the likelihood of the more complex model.

Determining whether  $\delta_{\text{obs}}$  is significantly different from a null expectation requires an approximate  $p$ -value — the probability of observing  $\delta_{\text{obs}}$  *if the simpler model were true*. That is, we need to compare the value  $\delta_{\text{obs}}$  to the distribution of  $\delta$  values under the simpler model. To create this distribution, we generated 500 datasets by simulating the simpler model at its MLE parameter estimates; we then fit both the simpler and more complex models to each simulated dataset and computed the values of  $\delta$ , producing a null distribution of  $\delta$  under the simpler model. We compared the observed value of  $\delta$  to this null distribution to calculate an approximate  $p$ -value.

Power conveys the (desirable) probability of rejecting the simpler model when the more complex model is true. To estimate power, we generated 500 datasets by simulating the more complex model at its MLE parameter estimates; we then fit the two models

and computed the values of  $\delta$ . The fraction of these  $\delta$  values that are greater than the 95% quantile of the distribution generated under the simpler model (described above) gives an estimate of power. All data and code necessary to carry out the analysis in this manuscript can be found at <https://github.com/claycressler/genomesize> and in Supplemental Material.

## Results

The best-fitting model for salamander genome size evolution accounted for four regimes: both non-feeding and feeding metamorphosis, paedomorphosis, and direct development (*meta<sub>f</sub>-meta<sub>nf</sub>-paed-dd*; Table 2) under an OU model that allowed both equilibrium genome size and noise intensity to vary across these regimes ( $\theta_i$ ,  $\sigma_i$ ,  $\alpha$ , Table 2). An identical 4-regime model with only a single noise intensity fit nearly as well (Table 2). Additionally, the three-regime *meta<sub>f</sub>-meta<sub>nf</sub>-other* ( $\theta_i$ ,  $\sigma_i$ ,  $\alpha$ ) hypothesis provided some explanatory power. These three models were far superior to the remaining models.

Overall, the addition of multiple  $\alpha$  values resulted in worse model fit relative to a uniform  $\alpha$  value, whereas the addition of multiple  $\sigma$  values relative to a single  $\sigma$  both improved and worsened model fit, depending on the hypothesis (Table 2). We present the results with the character state of the node at the base of the plethodontid lineage defined as metamorphosing. In the Supplementary Materials, we show that defining this node as direct-developing has no effect on the evolutionary conclusions we draw here.

The model selection bootstrap analysis allows us to quantify the degree of improvement in explanatory power provided by moving between specific hypotheses (Figure 2). Note that for each comparison, we used the version of the OU model that had the lowest AICc (Table 2), so comparisons involving *metamorphosis-other* and *meta-paed-dd* used the single- $\sigma$  model, whereas comparisons involving *meta<sub>f</sub>-meta<sub>nf</sub>-paed-dd* and *meta<sub>f</sub>-meta<sub>nf</sub>-other* used the multiple- $\sigma$  model.

Based on these results, we can reject any purely stochastic hypothesis for genome size evolution, as a model that allows for separate equilibrium values for metamorphosers was far superior to any purely neutral model (Table 2; Figure 2A). Specifying distinct equilibrium values for non-feeding and feeding metamorphosis substantially improves the explanatory power of any model (Figure 2C, D). In particular, the separation of metamorphosis into feeding and non-feeding categories provided far greater improvement of the model than subdividing the "other" category into direct development and paedomorphosis (compare the results in Figure 2C to those in Figure 2B, and Figure 2D to 2E). Allowing distinct noise parameters for each regime slightly improves the fit of the OU models with separate equilibria for non-feeding and feeding metamorphosis (Table 2), although the improvement over the single- $\sigma$  model is not significant (Comparison [6], Table 3; Figure 2F). Therefore, the best model included distinct equilibrium values for direct development, paedomorphosis, feeding metamorphosis, and non-feeding metamorphosis.

Table 2. Model comparison statistics. Best models (interrogated by bootstrap, Table 3) indicated in bold. Model parameterizations are indicated by:  $\sigma$  = Brownian motion;  $\sigma_i$  = Brownian motion with multiple noise intensities;  $\theta_i, \sigma, \alpha$  = OU model with multiple equilibria;  $\theta_i, \sigma_i, \alpha$  = OU model with multiple equilibria and multiple noise intensities;  $\theta_i, \sigma, \alpha_i$  = OU model with multiple equilibria and multiple deterministic pull strengths;  $\theta_i, \sigma_i, \alpha_i$  = OU model with multiple equilibria, noise intensities, and deterministic pull strengths.

| $\Delta AIC_c$                                    | Model                        |                            |                                |                              |            |          |
|---------------------------------------------------|------------------------------|----------------------------|--------------------------------|------------------------------|------------|----------|
|                                                   | OU Models                    |                            |                                |                              | BM Models  |          |
| Hypotheses                                        | $\theta_i, \sigma_i, \alpha$ | $\theta_i, \sigma, \alpha$ | $\theta_i, \sigma_i, \alpha_i$ | $\theta_i, \sigma, \alpha_i$ | $\sigma_i$ | $\sigma$ |
| <i>meta<sub>f</sub>-meta<sub>nf</sub>-paed-dd</i> | <b>0</b>                     | <b>1.1<sup>a</sup></b>     | 7.5                            | 8.1                          | 12.9       |          |
| <i>meta<sub>f</sub>-meta<sub>nf</sub>-other</i>   | 1.4 <sup>b</sup>             | 3.6                        | 6.1                            | 8.1                          | 11.1       |          |
| <i>meta-paed-dd</i>                               | 6.0                          | 3.4                        | 10.7                           | 7.9                          | 11.4       |          |
| <i>metamorphosis-other</i>                        | 5.8                          | 4.1                        | 8.0                            | 6.3                          | 9.5        |          |
| Brownian motion                                   |                              |                            |                                |                              |            | 31.8     |

<sup>a</sup> *meta<sub>f</sub>-meta<sub>nf</sub>-dd-paed* with single or multiple noise parameters  $\sigma$  are compared in Figure 2F.

<sup>b</sup> *meta<sub>f</sub>-meta<sub>nf</sub>-other* is compared against the best model via bootstrap in Figure 2E.

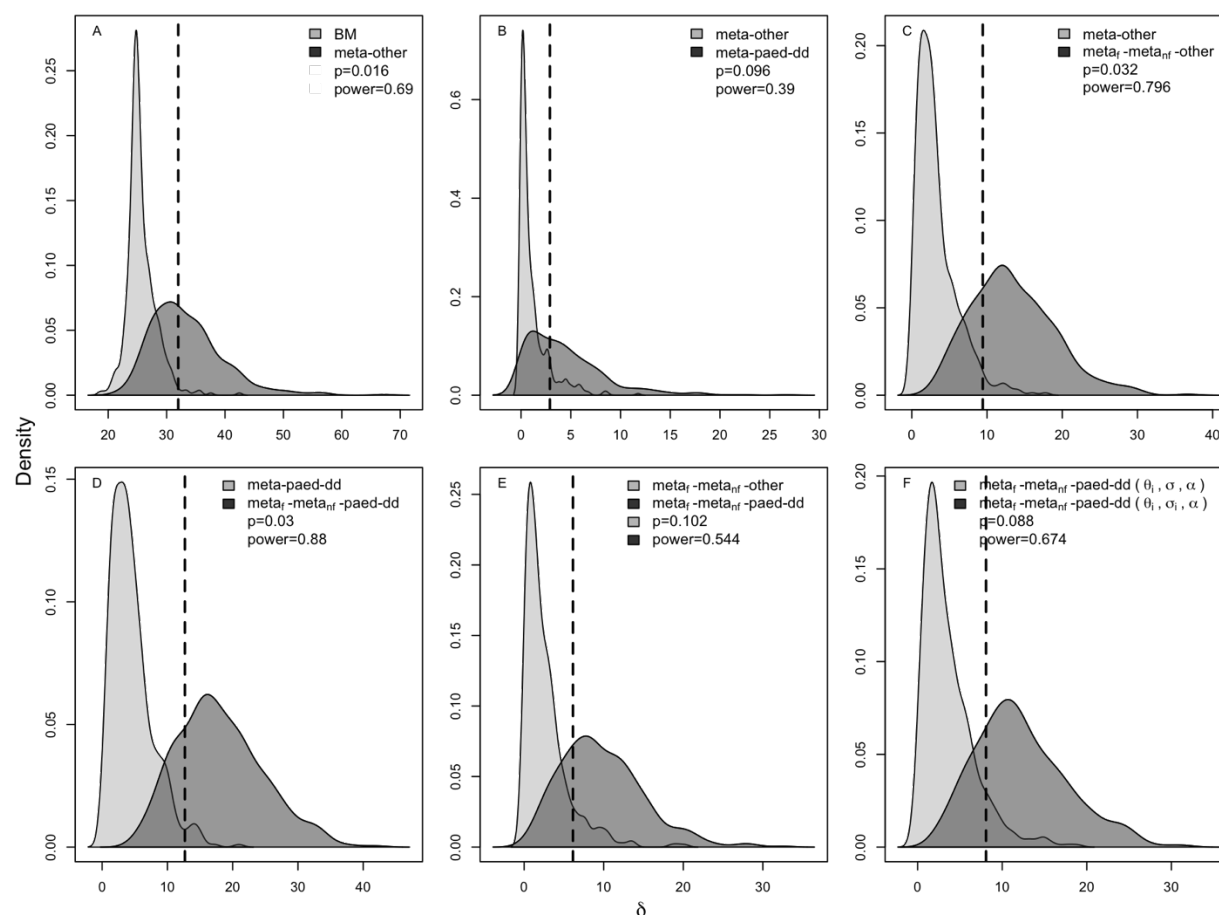

401

402 Figure 2. Bootstrap distributions of the likelihood difference ( $\delta$ ) calculated by generating  
403 500 datasets under each of two competing models at their MLE parameter estimates,  
404 refitting the two models, and computing  $\delta$ . The light gray region shows the probability  
405 density of the parameter when the data is generated by the simpler model; the dark  
406 gray region shows the density when the data is generated by the more complex model.  
407 The dashed line gives the observed value ( $\delta_{\text{obs}}$ ) from fitting the actual genome size  
408 data. The reported  $p$ -value is the fraction of the light gray distribution that lies to the right  
409 of  $\delta_{\text{obs}}$ ; the power is the fraction of the dark gray distribution that lies to the right of the  
410 95th percentile of the light gray distribution. Each panel evaluates the support for a dif-  
411 ferent hypothesis: (A) metamorphosis imposes a constraint on genome expansion; (B)  
412 there are distinct constraints imposed by the different non-metamorphosing strategies,  
413 direct development and pedomorphosis; (C) non-feeding metamorphosis imposes a  
414 distinct constraint from feeding metamorphosis; (D) non-feeding metamorphosis im-  
415 poses a distinct constraint from feeding metamorphosis, after accounting for differences  
416 in non-metamorphosing strategies; (E) non-metamorphosing strategies impose unique  
417 constraints, after accounting for differences between feeding and non-feeding metamor-  
418 phosis; (F) after identifying *meta<sub>F</sub>-meta<sub>nf</sub>-paed-dd* as best-fitting, this comparison tested  
419 whether fitting each regime with a distinct stochastic noise intensity improved fit to the  
420 data.

Parameter values for each regime estimated under the best-fitting model are presented in Table 3. Direct-developers, non-feeding metamorphosers, paedomorphs, and feeding metamorphosers have broadly overlapping stochastic noise intensity ( $\sigma$ ) values. Deterministic pull strength ( $\alpha$ ) takes an extremely small value, and the equilibrium values ( $\theta$ ) take extreme values both large and small. Although the deterministic pull strength parameter is vanishingly small, nevertheless, the models that account for metamorphosis are far superior to a purely stochastic model (Table 2). We note that the extreme nature of the parameter estimates is a consequence of the handling of the root state (see Supplementary Materials).



Table 3: Maximum likelihood parameter estimates and parametric bootstrap confidence intervals for the best-fitting model ( $meta_f$ - $meta_{nf}$ - $dd$ - $paed$   $\theta_i, \sigma_i, \alpha$ : separate equilibrium values and noise intensities for lineages in the four life history regimes:  $dd$  = direct development,  $meta_{nf}$  = non-feeding metamorphosis,  $meta_f$  = feeding metamorphosis,  $paed$  = paedomorphosis).

| Parameter                   |                      | MLE     | 95% CI            |
|-----------------------------|----------------------|---------|-------------------|
| Deterministic pull strength | $\alpha$             | 1.05e-7 | (1.01e-7, 1.7)    |
| Stochastic noise intensity  | $\sigma_{dd}$        | 0.365   | (0.308, 0.545)    |
|                             | $\sigma_{meta_{nf}}$ | 0.355   | (0.252, 0.525)    |
|                             | $\sigma_{meta_f}$    | 0.187   | (0.108, 0.283)    |
|                             | $\sigma_{paed}$      | 0.249   | (0.112, 0.464)    |
| Equilibrium value           | $\theta_{dd}$        | -3.77e5 | (-2.67e6, 1.99e6) |
|                             | $\theta_{meta_{nf}}$ | 3.62    | (3.32, 3.90)      |
|                             | $\theta_{meta_f}$    | -5.55e6 | (-7.62e6, 3.28)   |
|                             | $\theta_{paed}$      | 4.41e6  | (3.96, 6.29e6)    |

There is evidence of a deterministic trend  $\alpha(X - \theta)$  towards small genome size in salamanders that undergo non-feeding metamorphosis as well as a trend towards large genome size in paedomorphic salamanders (Table 4). In contrast, genome sizes in direct developing and feeding metamorphosing salamanders show no such trends. The range of values for the strength of the overall deterministic trend (Table 4) is much greater than the range of values for stochastic noise intensity (Table 3).

Table 4: Estimates of the deterministic trend in the best-fitting model for lineages evolving in each life history regime, based on the average genome size (log-scale) of salamanders in each regime. Genome sizes (in pg) are also shown in parentheses.

| Regime                    | Average log<br>genome size $X$ | Deterministic trend<br>$\alpha(\theta - X)$ |
|---------------------------|--------------------------------|---------------------------------------------|
| Direct development        | 3.66 (38.9 pg)                 | -0.0396                                     |
| Feeding metamorphosis     | 3.46 (31.8 pg)                 | 1.68e-8                                     |
| Non-feeding metamorphosis | 3.07 (21.5 pg)                 | -0.583                                      |
| Paedomorphosis            | 3.89 (48.9 pg)                 | 0.463                                       |

# Discussion

## *Biased stochastic expansion and life history constraints shape genome size.—*

Overall, evolution of genome size in salamanders is well-described by a weakly deterministic model with separate equilibria for each life history regime and moderate stochasticity. An increased level of constraint in lineages that evolved non-feeding metamorphosis, as well as a decreased level of constraint in lineages that have lost metamorphosis, exert the greatest deterministic influences on the evolution of genome size. The strength of the deterministic trend towards genome expansion for paedomorphs is roughly the same as the strength of the deterministic trend towards genome reduction for non-feeding metamorphosers; both are an order of magnitude stronger than the trend for direct-developers. Feeding metamorphosers have no deterministic trend (Table 4). Taken together, these results, and the observed spread of genome sizes within regimes, suggest that genome size evolution is driven by stochasticity with a bias toward increase — likely representing TE insertions that outpace deletions — constrained to varying degrees by metamorphic repatterning, when selection acts to limit metamorphic duration.

## *Metamorphosis as a vulnerable stage of the life cycle in amphibians*

Metamorphosis has been posited to exert evolutionary pressure for reduced genome size in amphibians to speed development during a vulnerable life stage. This hypothesis comes primarily from evidence in frogs. Metamorphosing frogs experience higher predation levels because they can neither swim nor hop effectively (Wassersug and Sperry

1977; Arnold and Wassersug 1978). In addition, frogs are unable to feed during metamorphosis, at a time when their energetic requirements can nearly double as compared to the period immediately preceding metamorphosis (Orlofske and Hopkins 2009; Wright, et al. 2011). Despite being homologous and retaining broad similarities at the transcriptomic, hormonal, and organismal levels (Sanchez, et al. 2018), salamander metamorphosis is different — and less dramatic — than frog metamorphosis. The process takes much longer in salamanders; timescales are on the order of weeks to months rather than days (Norman 1985; Downie, et al. 2004; Vladimirova, et al. 2012; Sanchez, et al. 2018), suggesting little, if any, time pressure. Metamorphosing salamanders do not experience compromised locomotion and are thus not more vulnerable to predation as are frogs (Landberg and Azizi 2010). In addition, metamorphosing salamanders do not have higher energetic requirements compared to non-metamorphosing individuals of the same species (Vladimirova, et al. 2012). Some salamanders, however, are unable to feed during metamorphosis, requiring that they undergo the transformation using only stored energy reserves (i.e., non-feeding metamorphosers) (Deban and Marks 2002)). Direct developers undergo the transformation inside the egg, fueled only by yolk stores. Genome size constraints for these two life history regimes likely reflect energetic vulnerability that is not relevant for the other two life histories considered here: feeding metamorphosis and paedomorphosis.

*Genome size evolution in feeding metamorphosers.*—Lineages that undergo metamorphosis, but are able to feed throughout the process, show no deterministic trend in genome size evolution. Rather, trait evolution is described by moderate stochastic noise

around an equilibrium value that we interpret as a balance between TE accumulation and a constraint imposed by metamorphosis. Although the animals are able to feed, there are other ways in which fitness can be lowered during salamander metamorphosis; for example, metamorphosing individuals are less able to exploit stream habitat refugia than either larvae or adults, which increases their mortality (Lowe, et al. 2019). Our results indicate that feeding metamorphosis imposes a less severe constraint on genome size than non-feeding metamorphosis, and we infer that the constraint is mediated by vulnerabilities other than depletion of energetic stores.

*Genome size evolution in non-feeding metamorphosers.*— Although other analyses have demonstrated a link between metamorphosis and genome size in salamanders (Wake and Marks 1993; Gregory 2002b; Sessions 2008; Bonett, et al. 2020), here we show that non-feeding metamorphosis imposes a substantial and distinct constraint, relative to feeding metamorphosis, as predicted if energetic vulnerability shapes the duration of metamorphosis. The deterministic trend toward smaller genome sizes within this regime is consistent with the imposition of a more severe constraint against genome expansion — or, put another way, selection towards genome size reduction — to shorten the duration of metamorphosis.

The evolution of non-feeding metamorphosis in plethodontids has been an important target of research because the phylogeny suggests that it evolved from a direct-developing ancestor(s), which necessitates the evolutionary reappearance of the “lost” larval stage (Chippindale, et al. 2004; Mueller, et al. 2004). This evolutionary transfor-

mation series was historically considered unlikely, although more recent work has revealed potential scenarios for regain of the larval stage (Bonett, et al. 2005; Bonett, et al. 2014). Under this scenario, in the direct-developing ancestral lineage(s), metamorphic repatterning steps were retained as part of the longer sequence of developmental events that occurred inside the egg (Kerney, et al. 2012). These changes were likely mediated by evolutionary changes in the timing of thyroid hormone activity and response (Rose 1995a, b; Bonett 2016). The re-evolution of (now non-feeding) metamorphosis reflected the insertion of a long, slow-growing larval growth phase back into ontogeny, followed by the synchronous occurrence of more drastic metamorphic repatterning events in the free-living organism (Rose 1995b, c; Beachy, et al. 2017). Metamorphic repatterning is more extreme in plethodontids than in other salamanders. Importantly, it involves a complete remodeling of the feeding apparatus, with the ceratobranchials (cartilaginous components of the tongue skeleton) replaced by new structures in the adult rather than remodeled from existing larval structures; this results in the inability to feed during metamorphosis (Alberch 1989; Rose 1995c; Deban and Marks 2002). Under the classical scenario, in contrast, this synchronization of metamorphosis and drastic remodeling of feeding structures would have evolved in a metamorphosing ancestor to produce non-feeding metamorphosis (Wake and Hanken 2004). Under either scenario, our results illustrate how phylogenetic comparative methods can reveal the evolutionary forces that have acted on genome size as lineages moved through the different life history regimes.

*Genome size evolution in direct developers.*—In direct-developing lineages, some or all of the developmental steps of metamorphic repatterning occur inside the egg at the end of embryogenesis (Alberch 1989; Kerney, et al. 2012); these lineages show a weak deterministic trend towards genome size reduction. Because they are occurring in an embryo rather than a free-living organism that has undergone a growth period, the repatterning happens to a smaller number of cells in a smaller overall mass of tissue compared with metamorphosing lineages (Downie, et al. 2004). Thus, the energetic requirements for comparable developmental steps are lower in direct developers than in metamorphosers. On the other hand, the energy to fuel these steps comes from yolk stores which, although plentiful in direct developers, are still finite (Wake and Hanken 2004). Thus, we infer that direct development imposes a less severe constraint on genome size than does non-feeding metamorphosis, mediated by the potential for depletion of energy stores if the duration of metamorphic repatterning during embryogenesis is too long. We note that there is greater variation across direct developers in metamorphic repatterning than is modeled here. In some cases, the sequence of developmental events is shortened because the formation of larval structures is lost from ontogeny. In other cases, most or all events of embryogenesis and metamorphosis are retained but occur inside the egg (which allows for the possibility of re-evolution of metamorphosis; Alberch 1989). We would predict more severe constraints in these latter lineages. Although we treated both scenarios as a single category for simplicity, these two types of direct development may be different in their effects on genome size evolution and warrant more detailed study.

*Genome size evolution in paedomorphs.*—Paedomorphic salamanders retain a larval body form throughout life and show a deterministic trend towards genome expansion. This trend is consistent with TE accumulation proceeding to higher overall levels, unchecked by any constraints imposed by metamorphic repatterning. However, we do not suggest that genome size is free from all constraints. The impacts of decreased surface-area-to-volume ratio that accompany increased cell size likely impose an upper limit on cell function that salamanders may well have reached (Chan and Marshall 2010); their cells are among the largest found in animals (Horner and Macgregor 1983). In addition, the duration of embryogenesis may well have an upper bound that constrains genome expansion at the extremely high end. In the past, huge cells have been proposed as adaptive because they coincide, at broad taxonomic levels, with low metabolic rates; salamanders and lungfishes have the lowest metabolic rates and the largest genomes/cells within vertebrates. This correlation led to the proposal that selection shaped an adaptive “frugal metabolic strategy” in these taxa (Szarski 1983; Olmo, et al. 1989). More recent analyses of the relationship between genome/cell size and metabolic rate, however, have failed to find a clear relationship (Licht and Lowcock 1991; Uyeda, et al. 2017; Gardner, et al. 2020). Thus, empirical evidence that huge genomes are a product of directional selection is currently lacking. Our results are more consistent with the relaxation of a constraint against genome expansion because of the extremely weak deterministic pull strength and strong stochastic noise parameters.

*Model complexity to capture the evolutionary process.*—While the best model includes a deterministic pull parameter, its magnitude is miniscule. Yet our model selection results



demonstrate that models with deterministic pull provide a huge improvement over any purely stochastic model (Table 2). One of the challenges of an OU model with a weak deterministic component is that the model parameters will be poorly defined (Cressler, et al. 2015). Intuitively, if the pull parameter ( $\alpha$ ) is important but close to zero, the equilibrium ( $\theta_i$ ) can take on a wide range of values in combination with a range of values for the stochastic parameter  $\sigma$  and explain the phenotypic distribution equally as well. The difference between a purely stochastic (BM) model and one that has any degree of deterministic pull is that the variance of a BM model will grow unbounded over time (as variance of a trait undergoing a Brownian motion process is proportional to time), whereas the variance in a model with deterministic pull will not (variance  $\sim \sigma^2 / 2\alpha$ ) (Hansen and Martins 1996; Butler and King 2004). Thus, while the phenotype may explore a wide range of values in an OU model with very small  $\alpha$ , it will remain bounded. For paedomorphs, a weak deterministic pull allows the mean to wander, while a far-away equilibrium value captures a deterministic trend toward increase. In OU models, increasing deterministic pull strength influences the approach to the equilibrium, but also will tend to dampen stochastic effects (apart from the influence of  $\sigma$ ), so it is possible to have both weak deterministic pull and substantial noise in the stochastic process. This analysis demonstrates that deterministic pull can exert an important evolutionary influence, even if the magnitude of alpha is weak.

But how complex a model is necessary? One might suppose that stronger deterministic pull on one portion of the tree would support a rate shift in  $\alpha$ . However, all multiple  $\alpha$  models performed poorly. This is consistent with extensive simulation results

showing that, among the three basic parameters of the OU model,  $\alpha$  is most poorly defined (Boettiger, et al. 2012; Ho and Ané 2013; Cressler, et al. 2015). Thus, even if a rate shift in  $\alpha$  existed, there is probably little power to detect it. In this study, we find that with multiple free parameters, we can readily capture shifts in the evolutionary process with variable  $\theta$  and perhaps  $\sigma$  over the tree, with stronger deterministic trends accomplished by moving  $\theta$  to more extreme values. A shift in  $\alpha$  is superlative, as changes in  $\alpha$  and  $\theta$  are not independently identifiable. Beyond cases with weak deterministic pull, difficulty in identifiability of  $\alpha$  may be a general problem for all comparative studies, as we do not know of a case as of yet where a multiple  $\alpha$  model was superior.

What this analysis clearly illustrates is the importance of including relevant biologically-informed hypotheses without over-parameterizing the evolutionary model. Isolating the evolutionary "signal" from the "noise" in this dataset was most strongly aided by including relevant hypotheses for variation in constraint, particularly by specifying shifts in metamorphosis and non-feeding metamorphosis along the evolutionary history of salamanders. When looking at adding parameters to the evolutionary model, the effects were variable with strongly positive ( $\alpha$ ), neutral (multiple  $\sigma$ ), or strongly detrimental (multiple  $\alpha$ ) effects on explanatory power. We note that the harm from overparameterizing is not only significantly poorer model scores, but at least in this dataset, the order of the hypotheses changed. It is possible that these significantly worse-fit models leak variation from some of the regime categories to the extraneous parameters. It is critical for model testing, therefore, to include a test of all of the meaningful biological

hypotheses with a range of parameterizations including models with fewer parameters.

*Exploring evolutionary constraints with the comparative method.*—Constraint has long been argued as a necessary component of the evolutionary toolbox, as workers realized that selection alone is insufficient to explain macroevolutionary shifts in phenotype (Alberch 1980; Gould 1980; Cheverud 1984). The concept of constraint is paradoxically both simple: "evolutionary constraints are restrictions or limitations on the course or outcome of evolution" and wide-reaching, including genetic, selective, developmental, and functional constraints (Arnold 1992). Many fields have attempted to quantify constraints at various levels of biological organization using the notion of limitation. Genetic constraints have been identified as limitations on genetic variation (Kirkpatrick and Lofsvold 1992), constrained responses to selection (Cheverud 1984), or multivariate correlations that are antagonistic to the direction of selection (Etterson and Shaw 2001). All of these mechanisms allow the phenotype to change in ways that are not directly adaptive. Developmental canalization, decisions in the developmental program which narrow the phenotypic possibilities in some traits later in ontogeny, illustrate the potentially creative force of constraint when coupled with modularity by opening opportunities for the larger jumps in phenotype that become possible by evolutionary changes in modules (Wagner 1988; Wagner and Altenberg 1996; Jones, et al. 2018). Here, bounds to evolution clearly extend the range of possible phenotypic evolution. In terms of broader comparative study, modularity in multivariate shape evolution has been studied via patterns of multivariate covariation, especially for skeletal features (Parsons, et al. 2012; Jones, et al. 2018). However, progress in applying concepts of constraint on single characters

has been hampered by a lack of precision in the concept of constraint and how it could be detected.

Adaptation is typically envisioned as an evolutionary process whereby phenotypes evolve in response to the strong pull toward an optimum, which tends to concentrate phenotypes about one or more optima after sufficient time has proceeded. On the other hand, an evolutionary process bounded by constraint would be dominated by stochastic evolution for much of the range of a phenotype, appearing as random evolution with a substantially larger — but bounded — variance. Only when the phenotype crosses a threshold would selection come into play, and this may occur due to correlated selection on another linked trait. Thus, the evolutionary “driving force” can simply be stochastic change with limits imposed by constraints. Our results support this theoretical model as an explanation for genome size evolution in salamanders. More generally, our results show that OU models, which incorporate both the change in the mean as well as variance of the phenotype, can be used to distinguish between trait evolution explained by a strong pull toward an optimum versus weak selection with bounded variance. Phylogenetic comparative methods have by and large focused on explaining shifts in mean phenotype, and have thus lent themselves well to studying adaptation, convergent evolution, and parallelism. By diving deeper into the exploration of stochastic models with opportunities for varying selection and noise, we can make great progress in understanding the action of constraint in shaping evolution.

*Salamanders as a model for linking organismal traits to genome biology.*—Much remains to be learned about how selection on organismal traits translates into changes in

genome size, and this represents a gap in our knowledge of genome biology and evolution that studies of salamanders can help to fill. For example, our results suggest that salamanders that undergo non-feeding metamorphosis can be leveraged as a model system to distinguish between possible mechanisms of genome reduction. Variation in genome size is introduced into a population by TE insertions and deletions. Selection could, in principle, sort among these genome size variants, even as the fitness consequences of individual TE loci are typically miniscule and effectively neutral (Lynch 2007; Arkhipova 2018). In addition, selection could sort among differences in TE control machinery including the pathways that underlie TE silencing and deletion, which could yield variants with greater differences in TE composition and fitness (Mueller 2015; Parhad and Theurkauf 2019; Parhad, et al. 2020). Comparing TE control machinery in non-feeding metamorphosers versus other life history regimes (e.g. paedomorphs) could identify the mechanisms underlying genome reduction.

*Conclusion.*— Overall, our study shows that the evolution of a life history that includes non-feeding metamorphosis exerts a unique influence on the evolution of genome size, imposing the most severe constraints of any salamander life history strategy. This result suggests that selection to shorten the duration of metamorphosis because of energetic vulnerability has indirectly selected for faster development, constraining cells and genomes to smaller sizes. We show that genome size evolution is shaped by strong stochastic forces that are not widely variable across the salamander clade, but that deterministic forces — which vary enormously across life histories — have also played an im-

portant role. We broaden the application of stochastic models of trait evolution to include constraint, and we highlight the challenges inherent in connecting model parameters and parameter values to complex biological phenomena.

# Literature Cited

Alberch P. 1989. Development and the evolution of amphibian metamorphosis. In: Spelchtna/Hilgers, editor. Trends in Vertebrate Morphology. Stuttgart: Gustav Fischer Verlag. p. 163-173.

Alberch P. 1980. Ontogenesis and morphological diversification. Am Zool 20:653-667.

AmphibiaWeb: Information on amphibian biology and conservation [Internet]. 2021. Berkeley, California. Available from <http://amphibiaweb.org/>.

Arkhipova IR. 2018. Neutral theory, transposable elements, and eukaryotic genome evolution. Mol Biol Evol 35:1332-1337.

Arnold SJ. 1992. Constraints on phenotypic evolution. Am Nat 140:S85-S107.

Arnold SJ, Wassersug RJ. 1978. Differential predation on metamorphic anurans by garter snakes (Thamnophis): Social behavior as a possible defense. Ecology 59:1014-1022.

Beachy CK, Ryan TJ, Bonett RM. 2017. How metamorphosis is different in plethodontids: Larval life history perspectives on life-cycle evolution. Herpetologica 73:252-258.

722 Beaulieu JM, Jhvueng D-C, Boettiger C, O'Meara BC. 2012. Modeling stabilizing  
723 selection: Expanding the Ornstein–Uhlenbeck model of adaptive evolution. *Evolution*  
724 66:2369-2383.

725 Boettiger C, Coop G, Ralph P. 2012. Is your phylogeny informative? Measuring the  
726 power of comparative methods. *Evolution* 66:2240-2251.

727 Bonett RM. 2016. An integrative endocrine model for the evolution of developmental  
728 timing and life history of plethodontids and other salamanders. *Copeia* 104:209-221.

729 Bonett RM, Hess AJ, Ledbetter NM. 2020. Facultative transitions have trouble  
730 committing, but stable life cycles predict salamander genome size evolution. *Evol Biol*  
731 47:111-122.

732 Bonett RM, Mueller RL, Wake DB. 2005. Why should reacquisition of larval stages by  
733 Desmognathine salamanders surprise us? *Herpetol Rev* 36:112.

734 Bonett RM, Steffen MA, Robison GA. 2014. Heterochrony repolarized: a phylogenetic  
735 analysis of developmental timing in plethodontid salamanders. *Evo Devo* 5:27.

736 Butler Marguerite A, King Aaron A. 2004. Phylogenetic comparative analysis: A  
737 modeling approach for adaptive evolution. *Am Nat* 164:683-695.

738 Carta A, Bedini G, Peruzzi L. 2020. A deep dive into the ancestral chromosome number  
739 and genome size of flowering plants. *New Phytol* 228:1097-1106.

740 Chan Y-HM, Marshall WF. 2010. Scaling properties of cell and organelle size.  
741 *Organogenesis* 6:88-96.

742 Cheverud JM. 1984. Quantitative genetics and developmental constraints on evolution  
743 by selection. *J Theor Biol* 110:155-171.

744 Cheverud JM, Dow MM, Leutenegger W. 1985. The quantitative assessment of  
745 phylogenetic constraints in comparative analyses: Sexual dimorphism in body weight  
746 among primates. *Evolution* 39:1335-1351.

747 Chippindale PT, Bonett RM, Baldwin AS, Wiens JJ. 2004. Phylogenetic evidence for a  
748 major reversal of life-history evolution in plethodontid salamanders. *Evolution* 58:2809-  
749 2822.

750 Cooper N, Thomas GH, Venditti C, Meade A, Freckleton RP. 2016. A cautionary note  
751 on the use of Ornstein Uhlenbeck models in macroevolutionary studies. *Biol J Linn Soc*  
752 118:64-77.

753 Cressler CE, Butler MA, King AA. 2015. Detecting adaptive evolution in phylogenetic  
754 comparative analysis using the Ornstein–Uhlenbeck model. *Syst Biol* 64:953-968.

755 Deban SM, Marks SB. 2002. Metamorphosis and evolution of feeding behaviour in  
756 salamanders of the family Plethodontidae. *Zool J Linn Soc* 134:375-400.

757 Decena-Segarra LP, Bizjak-Mali L, Kladnik A, Sessions SK, Rovito SM. 2020.  
758 Miniaturization, genome size, and biological size in a diverse clade of salamanders. *Am*  
759 *Nat* 196:634-648.

760 Downie JR, Bryce R, Smith J. 2004. Metamorphic duration: an under-studied variable in  
761 frog life histories. *Biol J Linn Soc* 83:261-272.

762 Edgar RC. 2004. MUSCLE: multiple sequence alignment with high accuracy and high  
763 throughput. *Nucleic Acids Res* 32:1792-1797.



- 764 Elliott TA, Gregory TR. 2015. What's in a genome? The C-value enigma and the  
765 evolution of eukaryotic genome content. *Philos Trans R Soc B: Biol Sci* 370:20140331.
- 766 Etterson JR, Shaw RG. 2001. Constraint to adaptive evolution in response to global  
767 warming. *Science* 294:151.
- 768 Felsenstein J. 1985. Phylogenies and the comparative method. *Am Nat* 125:1-15.
- 769 Frahry MB, Sun C, Chong R, Mueller RL. 2015. Low levels of LTR retrotransposon  
770 deletion by ectopic recombination in the gigantic genomes of salamanders. *J Mol Evol*  
771 80:120-129.
- 772 Gardner JD, Laurin M, Organ CL. 2020. The relationship between genome size and  
773 metabolic rate in extant vertebrates. *Philos Trans R Soc B* 375:20190146.
- 774 Gould SJ. 1980. Is a new and general theory of evolution emerging? *Paleobiology*  
775 6:119-130.
- 776 Gould SJ. 1977. *Ontogeny and Phylogeny*. Cambridge, MA: Harvard University Press.
- 777 Grafen A, Hamilton WD. 1989. The phylogenetic regression. *Philosophical Transactions*  
778 *of the Royal Society of London. B, Biological Sciences* 326:119-157.
- 779 Gregory TR. 2002a. A bird's eye view of the c-value enigma: genome size, cell size, and  
780 metabolic rate in the class Aves. *Evolution* 56:121-130.
- 781 Gregory TR. 2001. Coincidence, coevolution, or causation? DNA content, cell size, and  
782 the C-value enigma. *Biol Rev Camb Philos Soc* 76:65-101.
- 783 Gregory TR. 2005. *The Evolution of the Genome*. San Diego, CA: Academic Press.

784 Gregory TR. 2002b. Genome size and developmental complexity. *Genetica* 115:131-  
785 146.

786 Gregory, T. R. Animal Genome Size Database (<http://www.genomesize.com>) [Internet].  
787 2021.

788 Hansen TF. 1997. Stabilizing selection and the comparative analysis of adaptation.  
789 *Evolution* 51:1341-1351.

790 Hansen TF, Martins EP. 1996. Translating between microevolutionary process and  
791 macroevolutionary patterns: The correlation structure of interspecific data. *Evolution*  
792 50:1404-1417.

793 Hessen DO, Daufresne M, Leinaas HP. 2013. Temperature-size relations from the  
794 cellular-genomic perspective. *Biol Rev* 88:476-489.

795 Ho LST, Ané C. 2013. Asymptotic theory with hierarchical autocorrelation: Ornstein-  
796 Uhlenbeck tree models. *Ann Statist* 41:957-981.

797 Ho LST, Ané C. 2014. Intrinsic inference difficulties for trait evolution with Ornstein-  
798 Uhlenbeck models. *Methods Ecol Evol* 5:1133-1146.

799 Horner HA, Macgregor HC. 1983. C value and cell volume: their significance in the  
800 evolution and development of amphibians. *J Cell Sci* 63:135.

801 Huey RB, Bennett AF. 1987. Phylogenetic studies of coadaptation: preferred  
802 temperatures versus optimal performance temperatures of lizards. *Evolution* 41:1098-  
803 1115.

804 Jeffery NW, Yampolsky L, Gregory TR. 2016. Nuclear DNA content correlates with  
805 depth, body size, and diversification rate in amphipod crustaceans from ancient Lake  
806 Baikal, Russia. *Genome* 60:303-309.

807 Jockusch EL. 1997. An evolutionary correlate of genome size change in plethodontid  
808 salamanders. *Proc Royal Soc B: Biol Sci* 264:597.

809 Jones KE, Benitez L, Angielczyk KD, Pierce SE. 2018. Adaptation and constraint in the  
810 evolution of the mammalian backbone. *BMC Evol Biol* 18:172.

811 Keinath MC, Timoshevskiy VA, Timoshevskaya NY, Tsonis PA, Voss SR, Smith JJ.  
812 2015. Initial characterization of the large genome of the salamander *Ambystoma*  
813 *mexicanum* using shotgun and laser capture chromosome sequencing. *Sci Rep*  
814 5:16413.

815 Kerney RR, Blackburn DC, Müller H, Hanken J. 2012. Do larval traits re-evolve?  
816 Evidence from the embryogenesis of a direct-developing salamander, *Plethodon*  
817 *cinereus*. *Evolution* 66:252-262.

818 King Aaron A, Butler Marguerite A. 2009. OUCH: Ornstein-Uhlenbeck models for  
819 phylogenetic comparative hypotheses (R package).

820 Kirkpatrick M, Lofsvold D. 1992. Measuring selection and constraint in the evolution of  
821 growth. *Evolution* 46:954-971.

822 Landberg T, Azizi E. 2010. Ontogeny of escape swimming performance in the spotted  
823 salamander. *Funct Ecol* 24:576-587.

824 Lande R. 1980. Genetic variation and phenotypic evolution during allopatric speciation.  
825 *Am Nat* 116:463-479.

826 Licht LE, Lowcock LA. 1991. Genome size and metabolic rate in salamanders. Comp  
827 Biochem Physiol B: Comp Biochem 100:83-92.

828 Liedtke HC, Gower DJ, Wilkinson M, Gomez-Mestre I. 2018. Macroevolutionary shift in  
829 the size of amphibian genomes and the role of life history and climate. Nat Ecol Evol  
830 2:1792-1799.

831 Lowe WH, Swartz LK, Addis BR, Likens GE. 2019. Hydrologic variability contributes to  
832 reduced survival through metamorphosis in a stream salamander. Proc Natl Acad Sci  
833 USA 116:19563.

834 Lynch M. 2007. The Origins of Genome Architecture. Sunderland, MA: Sinauer  
835 Associates, Inc.

836 Maddison WP. 1991. Squared-change parsimony reconstructions of ancestral states for  
837 continuous-valued characters on a phylogenetic tree. Syst Biol 40:304-314.

838 Madison-Villar MJ, Sun C, Lau N, Settles M, Mueller RL. 2016. Small RNAs from a big  
839 genome: the piRNA pathway and transposable elements in the salamander species  
840 *Desmognathus fuscus*. J Mol Evol 83:126-136.

841 Michael TP. 2014. Plant genome size variation: bloating and purging DNA. Brief Funct  
842 Genom 13:308-317.

843 Mohlhenrich E, Mueller RL. 2016. Genetic drift, mutational hazard, and the evolution of  
844 genomic gigantism in salamanders. Evolution 70:2865-2878.

845 Moran NA. 1994. Adaptation and constraint in the complex life cycles of animals. Ann  
846 Rev Ecol Syst 25:573-600.

847 Mueller RL. 2015. Genome biology and the evolution of cell size diversity. In: Heald R,  
848 Hariharan I, Wake DB, editors. Size Control in Biology, from Organelles to Organisms:  
849 Cold Spring Harbor Press.

850 Mueller RL, Gregory TR, Gregory SM, Hsieh A, Boore JL. 2008. Genome size, cell size,  
851 and the evolution of enucleated erythrocytes in attenuate salamanders. *Zoology*  
852 111:218-230.

853 Mueller RL, Macey JR, Jaekel M, Wake DB, Boore JL. 2004. Morphological homoplasy,  
854 life history evolution, and historical biogeography of plethodontid salamanders inferred  
855 from complete mitochondrial genomes. *Proc Natl Acad Sci USA* 101:13820-13825.

856 Norman MF. 1985. A practical method for staging metamorphosis in the tiger  
857 salamander *Ambystoma tigrinum*. *Anatom Rec* 211:102-109.

858 Nowoshilow S, Schloissnig S, Fei J-F, Dahl A, Pang AWC, Pippel M, Winkler S, Hastie  
859 AR, Young G, Roscito JG, et al. 2018. The axolotl genome and the evolution of key  
860 tissue formation regulators. *Nature* 554:50-55.

861 O'Meara BC, Ané C, Sanderson MJ, Wainwright PC. 2006. Testing for different rates of  
862 continuous trait evolution using likelihood. *Evolution* 60:922-933.

863 Olmo E, Capriglione T, Odierna G. 1989. Genome size evolution in vertebrates: Trends  
864 and constraints. *Comp Biochem Phys B: Comp Biochem* 92:447-453.

865 Orlofske SA, Hopkins WA. 2009. Energetics of metamorphic climax in the pickerel frog  
866 (*Lithobates palustris*). *Comp Biochem Phys A: Molec Integ Phys* 154:191-196.

867 Pandit MK, White SM, Pocock MJO. 2014. The contrasting effects of genome size,  
868 chromosome number and ploidy level on plant invasiveness: a global analysis. *New*  
869 *Phytol* 203:697-703.

870 Parhad SS, Theurkauf WE. 2019. Rapid evolution and conserved function of the piRNA  
871 pathway. *Roy Soc Open Biol* 9:180181.

872 Parhad SS, Yu T, Zhang G, Rice NP, Weng Z, Theurkauf WE. 2020. Adaptive evolution  
873 targets a piRNA precursor transcription network. *Cell Rep* 30:2672-2685.e2675.

874 Parsons KJ, Márquez E, Albertson RC. 2012. Constraint and opportunity: The genetic  
875 basis and evolution of modularity in the cichlid mandible. *Am Nat* 179:64-78.

876 Pasquesi GIM, Adams RH, Card DC, Schield DR, Corbin AB, Perry BW, Reyes-Velasco  
877 J, Ruggiero RP, Vandewege MW, Shortt JA, et al. 2018. Squamate reptiles challenge  
878 paradigms of genomic repeat element evolution set by birds and mammals. *Nat*  
879 *Commun* 9:2774.

880 Posada D, Crandall KA. 1998. MODELTEST: testing the model of DNA substitution.  
881 *Bioinformatics* 14:817-818.

882 Pyron AR, Wiens JJ. 2011. A large-scale phylogeny of Amphibia including over 2800  
883 species, and a revised classification of extant frogs, salamanders, and caecilians. *Mol*  
884 *Phylogenet Evol* 61:543-583.

885 R Core Team. 2020. R: A language and environment for statistical computing. Vienna,  
886 Austria: R Foundation for Statistical Computing.

887 Roddy AB, Thérout-Rancourt G, Abbo T, Benedetti JW, Brodersen CR, Castro M,  
888 Castro S, Gilbride AB, Jensen B, Jiang G-F, et al. 2019. The scaling of genome size

889 and cell size limits maximum rates of photosynthesis with implications for ecological  
890 strategies. Int J Plant Sci 181:75-87.

891 Rose CS. 2014. The importance of cartilage to amphibian development and evolution.  
892 Int J Dev Biol 58:917-927.

893 Rose CS. 1995a. Skeletal morphogenesis in the urodele skull: II. Effect of  
894 developmental stage in thyroid hormone-induced remodeling. J Morph 223:149-166.

895 Rose CS. 1995b. Skeletal morphogenesis in the urodele skull: III. Effect of hormone  
896 dosage in th-induced remodeling. J Morph 223:243-261.

897 Rose CS. 1995c. Skeletal morphogenesis in the urodele skull:I. Postembryonic  
898 development in the hemidactyliini (amphibia: Plethodontidae). J Morph 223:125-148.

899 Sanchez E, Küpfer E, Goedbloed DJ, Nolte AW, Lüddecke T, Schulz S, Vences M,  
900 Steinfartz S. 2018. Morphological and transcriptomic analyses reveal three discrete  
901 primary stages of postembryonic development in the common fire salamander,  
902 *Salamandra salamandra*. J Exp Zool B: 330:96-108.

903 Sanderson MJ. 2003. r8s: inferring absolute rates of molecular evolution and  
904 divergence times in the absence of a molecular clock. Bioinformatics 19:301-302.

905 Schluter D, Price T, Mooers AØ, Ludwig D. 1997. Likelihood of ancestor states in  
906 adaptive radiation. Evolution 51:1699-1711.

907 Sessions SK. 2008. Evolutionary cytogenetics in salamanders. Chromosome Res  
908 16:183-201.

- 909 Shao F, Han M, Peng Z. 2019. Evolution and diversity of transposable elements in fish  
910 genomes. *Sci Rep* 9:15399.
  
- 911 Simpson GG. 1953. *The Major Features of Evolution*. New York: Columbia University  
912 Press.
  
- 913 Smith JDL, Bickham JW, Gregory TR. 2013. Patterns of genome size diversity in bats  
914 (order Chiroptera). *Genome* 56:457-472.
  
- 915 Sotero-Caio CG, Platt RN, II, Suh A, Ray DA. 2017. Evolution and diversity of  
916 transposable elements in vertebrate genomes. *Genome Biol Evol* 9:161-177.
  
- 917 Stamatakis A. 2006. RAxML-VI-HPC: maximum likelihood-based phylogenetic analyses  
918 with thousands of taxa and mixed models. *Bioinformatics* 22:2688-2690.
  
- 919 Sun C, Arriaza JRL, Mueller RL. 2012. Slow DNA loss in the gigantic genomes of  
920 salamanders. *Genome Biol Evol* 4:1340-1348.
  
- 921 Sun C, Mueller RL. 2014. Hellbender genome sequences shed light on genome  
922 expansion at the base of crown salamanders. *Genome Biol Evol* 6:1818-1829.
  
- 923 Sun C, Shepard DB, Chong RA, Arriaza JL, Hall K, Castoe TA, Feschotte C, Pollock  
924 DD, Mueller RL. 2012. LTR retrotransposons contribute to genomic gigantism in  
925 plethodontid salamanders. *Genome Biol Evol* 4:168-183.
  
- 926 Szarski H. 1983. Cell size and the concept of wasteful and frugal evolutionary  
927 strategies. *J Theor Biol* 105:201-209.
  
- 928 Uyeda JC, Pennell MW, Miller ET, Maia R, McClain CR. 2017. The evolution of  
929 energetic scaling across the vertebrate tree of life. *Am Nat* 190:185-199.



- 930 Vieites DR, Román SN, Wake MH, Wake DB. 2011. A multigenic perspective on  
931 phylogenetic relationships in the largest family of salamanders, the Plethodontidae. Mol  
932 Phylogenet Evol 59:623-635.
  
- 933 Vinogradov AE. 2004. Genome size and extinction risk in vertebrates. Proc Roy Soc B  
934 271:1701-1705.
  
- 935 Vladimirova IG, Kleimenov SY, Alekseeva TA. 2012. Dynamics of body mass and  
936 oxygen consumption in the ontogeny of the Spanish ribbed newt (*Pleurodeles waltl*): 2.  
937 Larval stage. Biol Bull 39:10-14.
  
- 938 Vu GTH, Cao HX, Reiss B, Schubert I. 2017. Deletion-bias in DNA double-strand break  
939 repair differentially contributes to plant genome shrinkage. New Phytol 214:1712-1721.
  
- 940 Wagner GP. 1988. The significance of developmental constraints for phenotypic  
941 evolution by natural selection. In: de Jong G, editor. Population Genetics and Evolution.  
942 Berlin, Heidelberg: Springer.
  
- 943 Wagner GP, Altenberg L. 1996. Perspective: Complex adaptations and the evolution of  
944 evolvability. Evolution 50:967-976.
  
- 945 Wake D, Hanken J. 2004. Direct development in the lungless salamanders: what are  
946 the consequences for developmental biology, evolution and phylogenesis? Int J Dev  
947 Biol 40:859-869.
  
- 948 Wake DB, Marks SB. 1993. Development and evolution of plethodontid salamanders: a  
949 review of prior studies and a prospectus for future research. Herpetologica 49:194-203.
  
- 950 Waltari E, Edwards SV. 2002. Evolutionary dynamics of intron size, genome size, and  
951 physiological correlates in archosaurs. Am Nat 160:539-552.

- 952    Wassersug RJ, Sperry DG. 1977. The relationships of locomotion to differential  
953    predation on *Pseudacris triseriata* (anura: Hylidae). Ecology 58:830-839.
- 954    Wiens JJ, Bonett RM, Chippindale PT. 2005. Ontogeny discombobulates phylogeny:  
955    paedomorphosis and higher-level salamander relationships. Syst Biol 54:91-110.
- 956    Wright ML, Richardson SE, Bigos JM. 2011. The fat body of bullfrog (*Lithobates*  
957    *catesbeianus*) tadpoles during metamorphosis: Changes in mass, histology, and  
958    melatonin content and effect of food deprivation. Comp Biochem Phys A 160:498-503.
- 959    Zheng Y, Peng R, Kuro-o M, Zeng X. 2011. Exploring patterns and extent of bias in  
960    estimating divergence time from mitochondrial DNA sequence data in a particular  
961    lineage: a case study of salamanders (Order Caudata). Mol Biol Evol 28:2521-2535.  
962
